# Supplementary material for: A novel hierarchical precursor of densely integrated hydroxide nanoflakes on oxide microspheres toward high-performance layered Ni-rich cathode for lithium ion batteries
Source: Royal Society of Chemistry journal article supplement (doi:10.1039/c8qm00326b), 2018-01-01
Supplement: c8qm00326b1.pdf [file c8qm00326b1.pdf]

Supplementary Information

**A novel layered Ni-rich cathode hierarchical architecture of densely integrating hydroxide nanoflakes onto oxide microspheres with superior lithium storage property**

Yan Li,<sup>a</sup> Xinhai Li,<sup>a</sup> Zhixing Wang,<sup>a</sup> Huajun Guo,<sup>a</sup> Tao Li,<sup>a</sup> Kui Meng,<sup>a</sup> and Jiexi Wang<sup>\*a,b</sup>

<sup>a</sup> School of Metallurgy and Environment, Central South University, Changsha 410083, P.R. China.

<sup>b</sup> State Key Laboratory of Powder Metallurgy, Central South University, Changsha 410083, P.R. China.

\* Corresponding author. Tel: +86-731-88836633, Fax: +86-731-88836633

Email address: [wangjiexikeen@csu.edu.cn](mailto:wangjiexikeen@csu.edu.cn)

**1. Chemical composition of the precursors and the as-prepared cathodes**

Table S1 Chemical composition of the precursors and the as-prepared cathodes

| Samples                                                                                                               | Li    | Ni    | Co    | Mn    |
|-----------------------------------------------------------------------------------------------------------------------|-------|-------|-------|-------|
| $\text{Ni}_{0.8}\text{Co}_{0.1}\text{Mn}_{0.1}(\text{OH})_2@ \text{Ni}_{0.8}\text{Co}_{0.1}\text{Mn}_{0.1}\text{O}_x$ | /     | 0.803 | 0.095 | 0.102 |
| $\text{LiNi}_{0.8}\text{Co}_{0.1}\text{Mn}_{0.1}\text{O}_2$                                                           | 1.000 | 0.809 | 0.101 | 0.106 |

**2. Particle morphology of the spray pyrolyzed  $\text{Ni}_{0.8}\text{Co}_{0.1}\text{Mn}_{0.1}\text{O}_x$  microspheres**

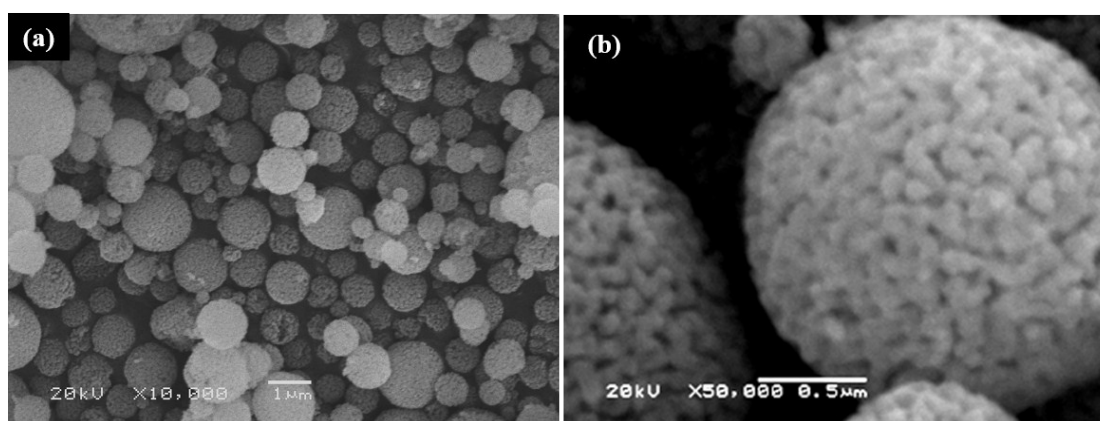

Fig.S1. SEM of the spray pyrolyzed  $\text{Ni}_{0.8}\text{Co}_{0.1}\text{Mn}_{0.1}\text{O}_x$  microspheres

### 3. Particle size distribution of the precursors and cathodes

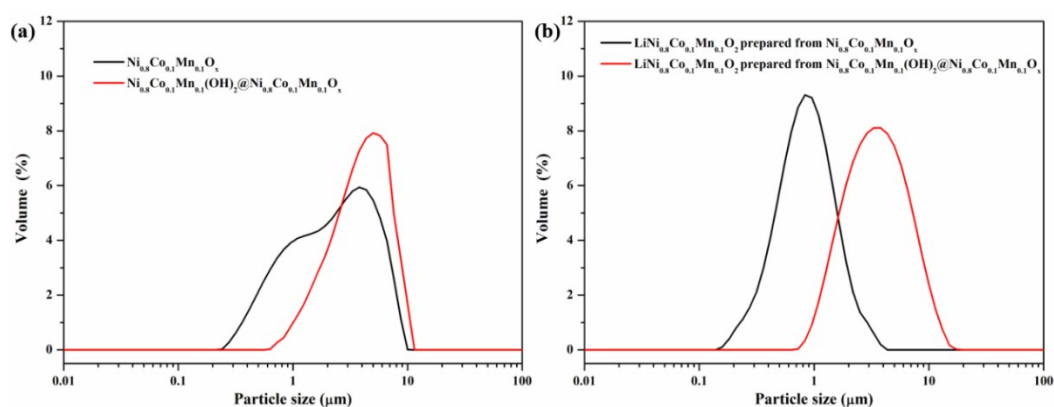

Fig.S2 Particle size distribution of (a)  $\text{Ni}_{0.8}\text{Co}_{0.1}\text{Mn}_{0.1}\text{O}_x$  and  $\text{Ni}_{0.8}\text{Co}_{0.1}\text{Mn}_{0.1}(\text{OH})_2@\text{Ni}_{0.8}\text{Co}_{0.1}\text{Mn}_{0.1}\text{O}_x$ -precursors and (b) cathodes prepared from the two precursors.

### 4. SEM images of the $\text{LiNi}_{0.8}\text{Co}_{0.1}\text{Mn}_{0.1}\text{O}_2$ prepared from the precursors obtained at 1.5 and 2 h co-precipitation reaction.

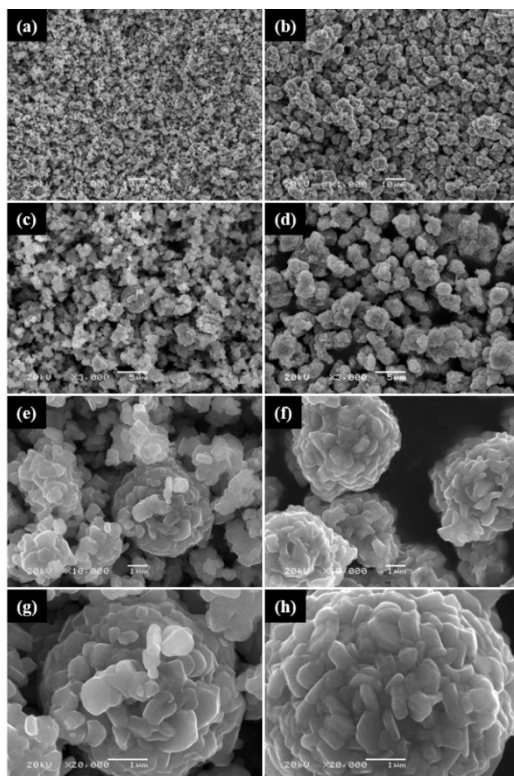

Fig.S3. SEM of the  $\text{LiNi}_{0.8}\text{Co}_{0.1}\text{Mn}_{0.1}\text{O}_2$  prepared from the precursors obtained at different time intervals during the co-precipitation reaction: (a,c,e,g) 1.5 h; (b,d,f,h) 2 h.

#### 4. Performance comparison of $\text{LiNi}_{0.8}\text{Co}_{0.1}\text{Mn}_{0.1}\text{O}_2$ cathode in this work and the previous reported works

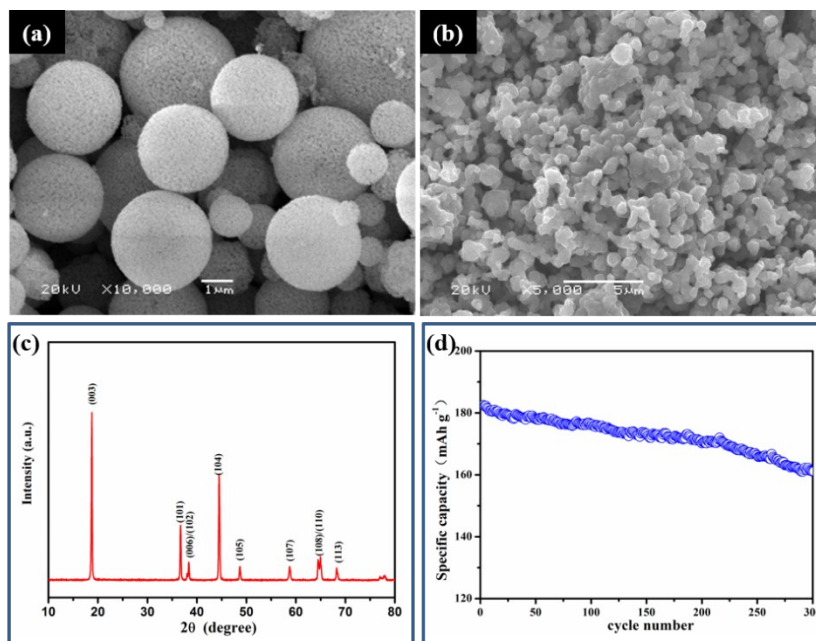

Fig. S4. (a) SEM of the  $\text{Ni}_{0.8}\text{Co}_{0.1}\text{Mn}_{0.1}\text{O}_x$  precursors obtained from spray pyrolysis; (b) SEM of  $\text{LiNi}_{0.8}\text{Co}_{0.1}\text{Mn}_{0.1}\text{O}_2$  cathodes prepared from  $\text{Ni}_{0.8}\text{Co}_{0.1}\text{Mn}_{0.1}\text{O}_x$ ; (c) XRD patterns of the as-prepared  $\text{LiNi}_{0.8}\text{Co}_{0.1}\text{Mn}_{0.1}\text{O}_2$  cathodes; (d) Cycle performance of the as-prepared  $\text{LiNi}_{0.8}\text{Co}_{0.1}\text{Mn}_{0.1}\text{O}_2$  cathodes.

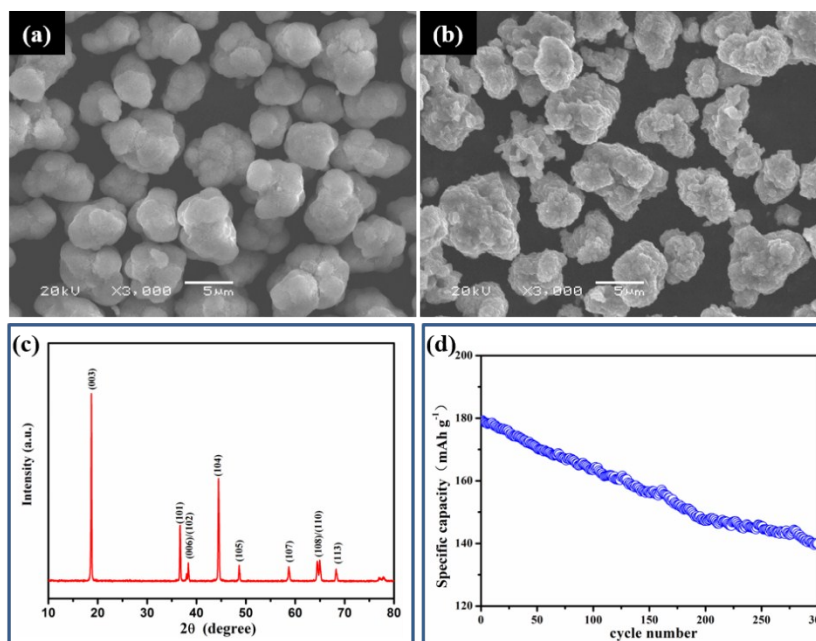

Fig. S5. (a) SEM of the  $\text{Ni}_{0.8}\text{Co}_{0.1}\text{Mn}_{0.1}(\text{OH})_2$  precursors obtained from co-precipitation reaction; (b) SEM of  $\text{LiNi}_{0.8}\text{Co}_{0.1}\text{Mn}_{0.1}\text{O}_2$  cathodes prepared from  $\text{Ni}_{0.8}\text{Co}_{0.1}\text{Mn}_{0.1}(\text{OH})_2$ ; (c) XRD patterns of the as-prepared  $\text{LiNi}_{0.8}\text{Co}_{0.1}\text{Mn}_{0.1}\text{O}_2$  cathodes; (d) Cycle performance of the as-prepared  $\text{LiNi}_{0.8}\text{Co}_{0.1}\text{Mn}_{0.1}\text{O}_2$  cathodes.
